# Supplementary material
Source: publisher site journal article supplement (https://www.spandidos-publications.com/3452/downloadSupplementary)

Figure S1. Antiviral effect of OOS and VS on H460 and OVCAR-8 cells. Effect of OOS and VS pre-treatment on H460 (A) or OVCAR-8 cells (B) measured by flow cytometry. GFP positive populations were detected in living untreated cells, and compared with those that had been pre-treated with a 1:100 dilution of OOS or VS. Images of a representative experiment that was repeated at least 4 times. OOS, Ocoxin oral solution; VS, Viusid; GFP, green fluorescence protein.

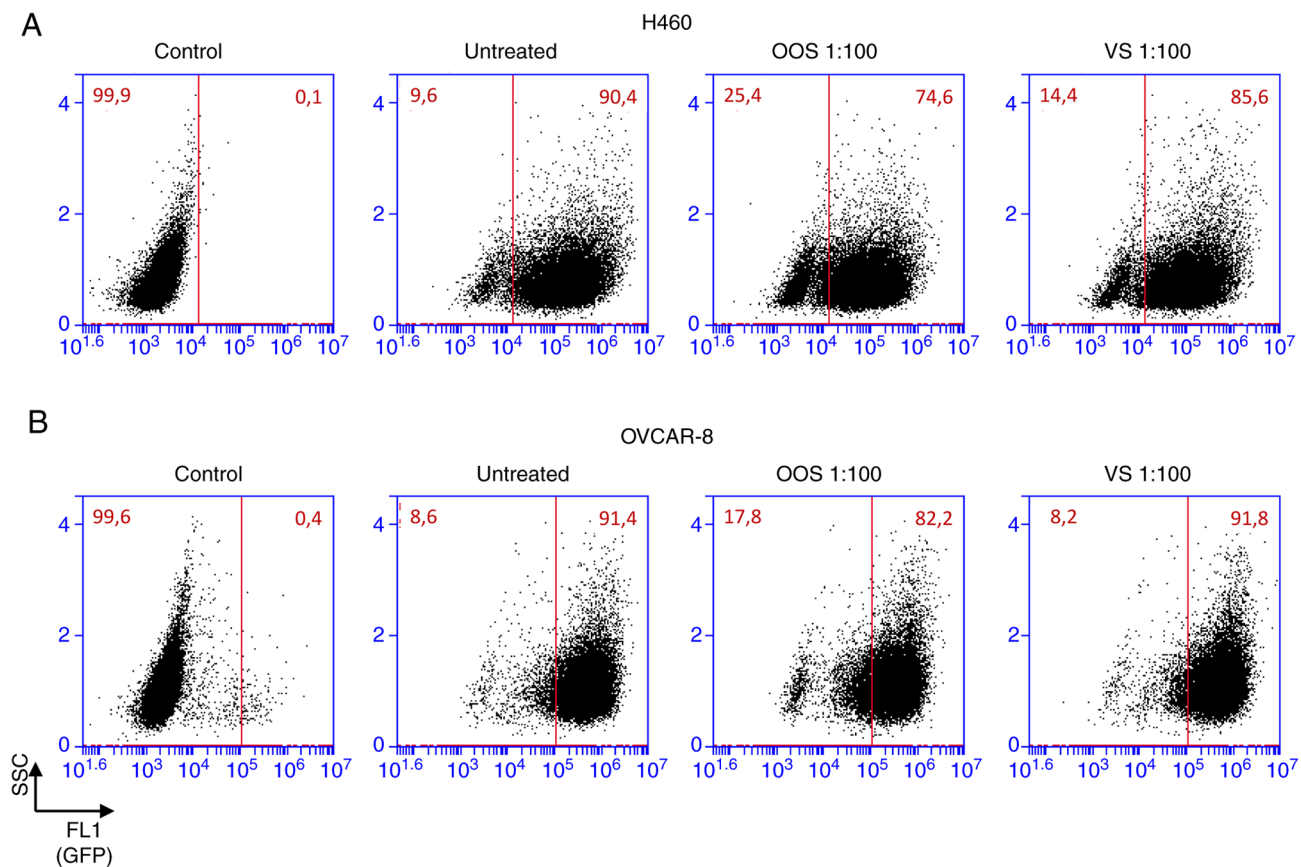

Supplement: Supplementary file 1 [file downloadSupplementary]
